# Supplementary material for: Measurement of alkyl and multifunctional organic nitrates by Proton Transfer Reaction Mass Spectrometry
Source: Copernicus journal article supplement (doi:10.5194/amt-2016-318), 2016-11-07
Supplement: Supplementary file 1 [file amt-2016-318-supplement.pdf]

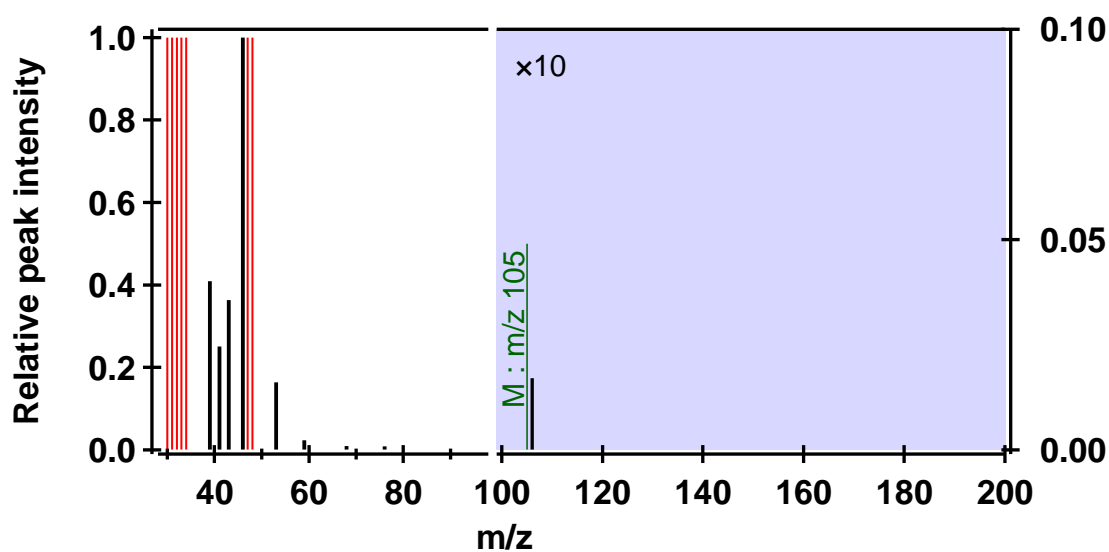

Figure S1. Recorded mass spectrum of AlkC3 (black bars) at the lowest extent of fragmentation of the molecular ion at  $m/z = 106$  ( $E/N = 78$  Td) in the  $H_3O^+$  ionization mode. The green thin line represents the expected molecular ion of the analyte and the intense signals depicted by the red thin bars represent the matrix analytes at  $m/z = 30$  ( $NO^+$ ) and  $46$  ( $NO_2^+$ ) and their isotopic abundance signals at  $m/z = 31$  and  $47, 48$  respectively. The signals corresponding to the water clusters ( $H_3O^+(H_2O)_n$ ) at  $m/z = 37$  and  $55$  are systematically erased for simplification.

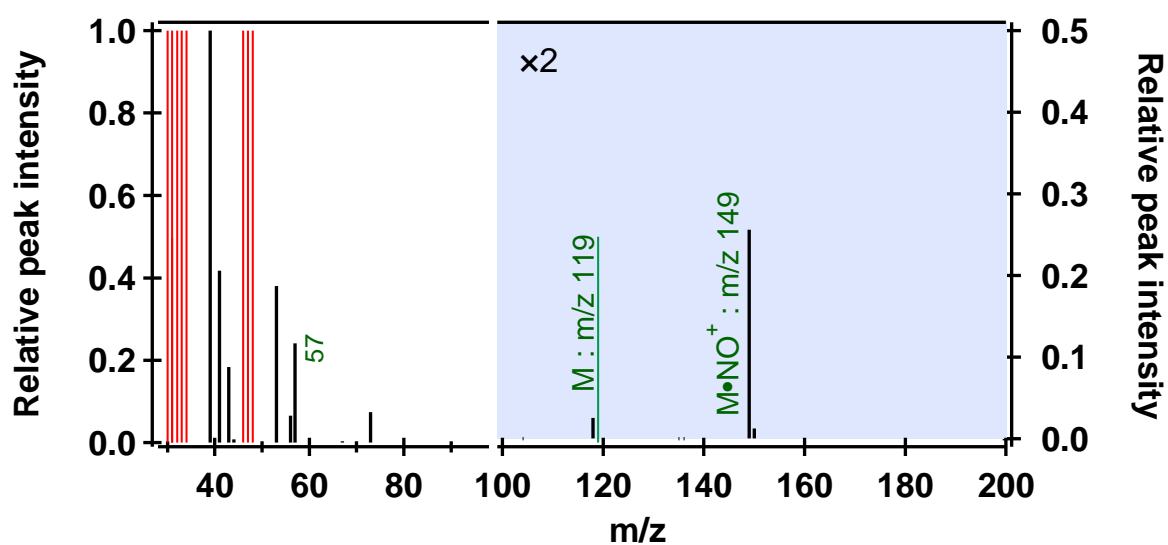

Figure S2. Recorded mass spectra of AlkiC4 (black bars) at the lowest extent of fragmentation ( $E/N^* = 34$  Td) in the  $\text{NO}^+$  ionization mode.

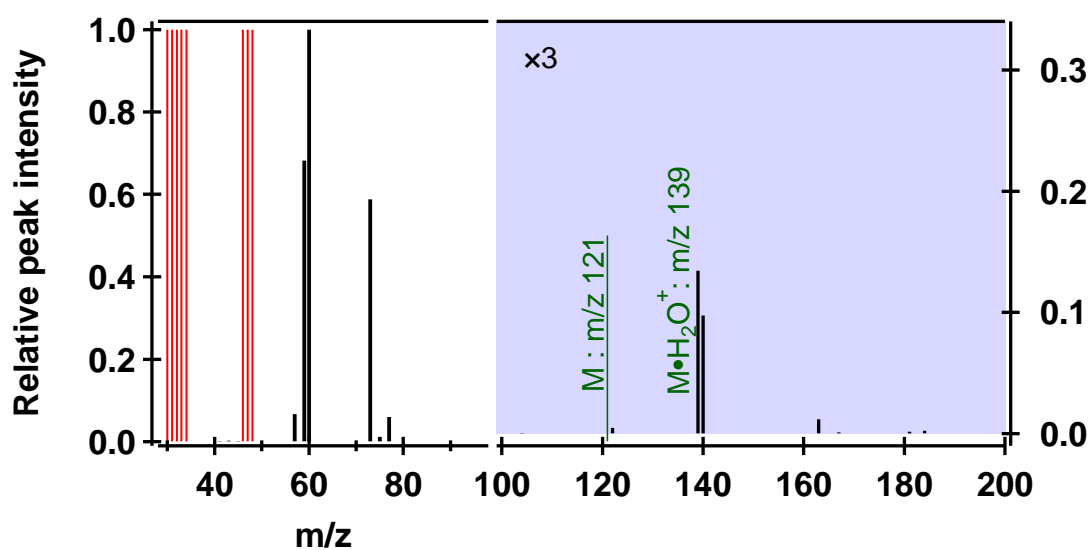

Figure S3. Recorded mass spectrum of 1OH3C3 (black bars) at the lowest extent of fragmentation ( $E/N = 62$  Td) in the  $H_3O^+$  ionization mode in absence of the RF device.

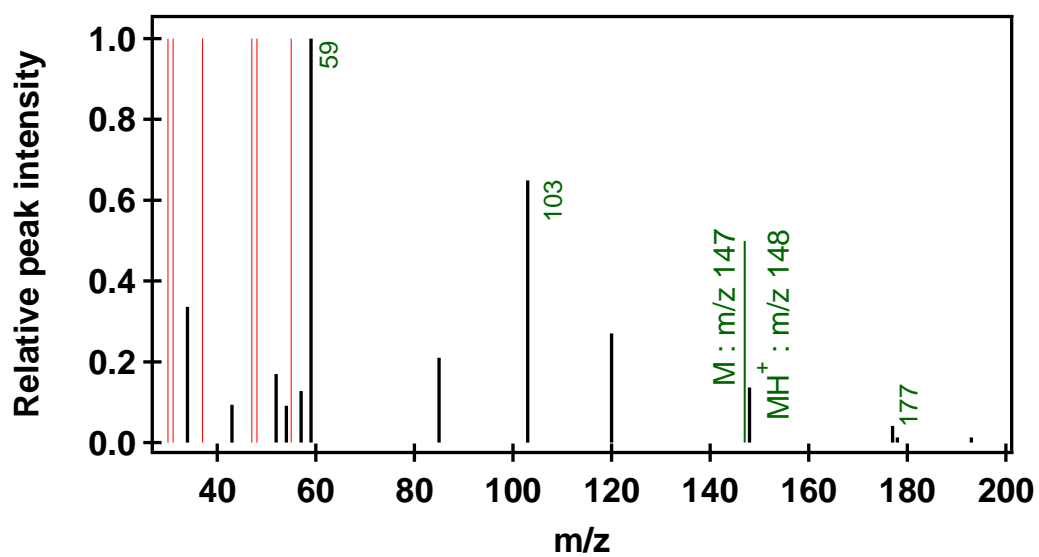

Figure S4. Recorded mass spectra of protonated KnC5 (black bars) for  $E/N = 75$  Td, corresponding to the highest sensibility for the protonated analyte signal detection ( $m/z$  148).

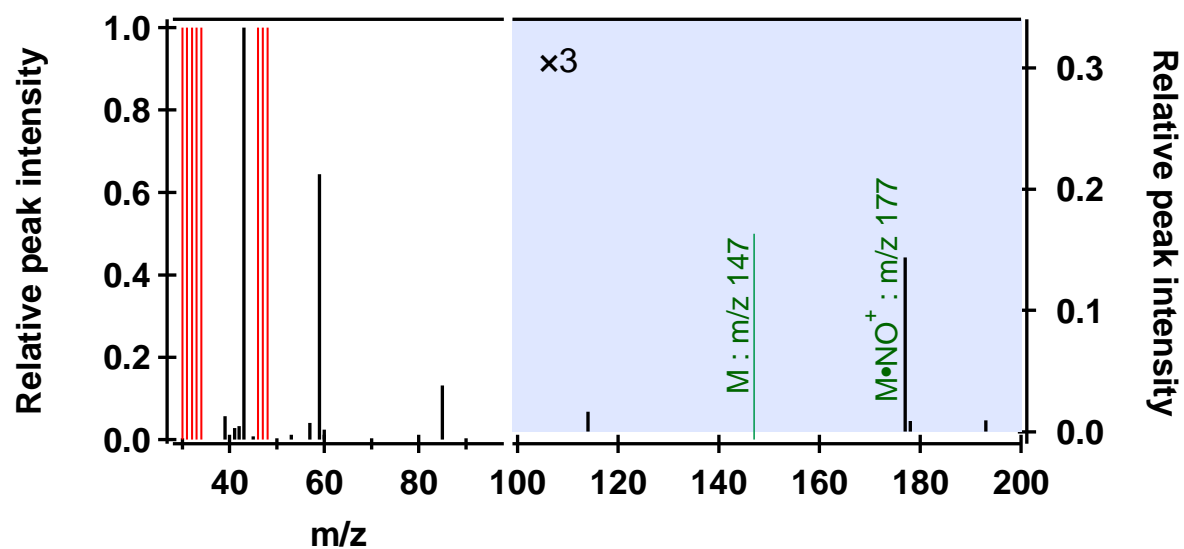

Figure S5. Recorded mass spectra of KnC5 adduct (black bars) at the lowest extent of fragmentation ( $E/N^* = 36$  Td) in the  $\text{NO}^+$  ionization mode.

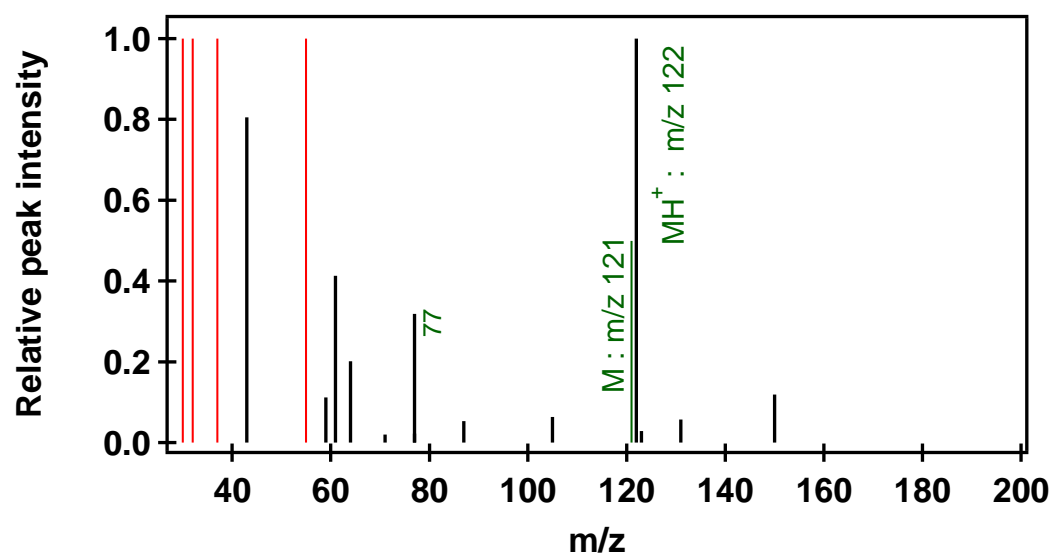

Figure S6. Recorded mass spectrum of protonated PAN (black bars) for E/N = 85 Td, corresponding to the highest sensibility of the m/z 122 signal detection.
